# Supplementary material for: Acute symptomatic vitreous floaters assessed with ultra-wide field scanning laser ophthalmoscopy and spectral domain optical coherence tomography
Source: PubMed Central journal article supplement (PMC8076170; doi:10.1038/s41598-021-88371-9), 2021-04-26
Supplement: 41598_2021_88371_MOESM1_ESM.pdf [file 41598_2021_88371_MOESM1_ESM.pdf]

# **Acute Symptomatic Vitreous Floaters Assessed with Ultra-Wide Field Scanning Laser Ophthalmoscopy and Spectral Domain Optical Coherence Tomography**

Gisung Son, M.D.<sup>1,2</sup>, Joon Hong Sohn, M.D.<sup>1</sup>, Mingui Kong, M.D.(\*)<sup>1,2</sup>

1. Department of retinal service, Hangil Eye Hospital, Incheon, South Korea
2. Department of Ophthalmology, Catholic Kwandong University College of Medicine, Incheon 22711, Korea

## **Corresponding author**

Mingui Kong, M.D.

Department of Ophthalmology, Hangil Eye Hospital

35 Bupyeong-daero, Bupyeong-gu, Incheon, Korea. 21388

Tel: +82-32-503-3322

Fax: +82-32-504-3322

E-mail: eyedockong@gmail.com

**Supplementary Table 1.**

**Comparison between the ophthalmological outcomes of the two eyes of patients who complained of floaters in both eyes**

| Patients with unilateral vitreous floaters | Earlier Sx eyes * (n = 33) | Later Sx eyes * (n = 33) | P-value <sup>†</sup> |
|--------------------------------------------|----------------------------|--------------------------|----------------------|
| Age (21~72)                                |                            |                          | N/A                  |
| BCVA (logMAR)                              | 0.04 ± 0.06                | 0.06 ± 0.13              | 0.48                 |
| S.E. (D)                                   | -00.66 ± 1.76              | -1.26 ± 3.66             | 0.39                 |
| IOP (mmHg)                                 | 17.03 ± 13.34              | 14.21 ± 3.18             | 0.24                 |
| CMT (μm)                                   | 262.44 ± 24.35             | 258.94 ± 21.24           | 0.65                 |
| pRNFL thickness (μm)                       | 104.60 ± 11.73             | 105.60 ± 0.51            | 0.71                 |
| Weiss ring on UWF                          |                            |                          |                      |
| - None                                     | 14 eyes (42.4%)            | 21 eyes (63.6%)          | 0.51                 |
| - Weiss ring                               | 19 eyes (57.6%)            | 12 eyes (36.4%)          |                      |
| PVD on SD-OCT (*)                          |                            |                          |                      |
| - None                                     | 2 eyes (10.0%)             | 3 eyes (15.0%)           | 0.90                 |
| - Stage A                                  | 3 eyes (15.0%)             | 3 eyes (15.0%)           |                      |
| - Stage B                                  | Absent                     | Absent                   |                      |
| - Stage C                                  | 15 eyes (75.0%)            | 14 eyes (70.0%)          |                      |

Comparisons between both eyes of patients with bilateral vitreous floaters.

\* Eyes were divided into earlier and later classes depending on which eye developed the vitreous floaters first.

† P-value was calculated using students' T-test for numerical values and Fisher's exact test for categorical values.

Sx: symptoms; BCVA: Best-Corrected Visual Acuity; logMAR: logarithm of minimal angle of resolution; S.E: Spherical Equivalent; D: Diopters; IOP: Intraocular Pressure; CMT: Central Macular Thickness; pRNFL: peripapillary Retinal Nerve Fiber Layer;
